# Supplementary material for: A spin-flip variant of the second-order approximate coupled-cluster singles and doubles method
Source: Royal Society of Chemistry journal article supplement (doi:10.1039/d2cp04574e), 2022-01-01
Supplement: d2cp04574e1.pdf [file d2cp04574e1.pdf]

# A spin-flip variant of the second-order approximate coupled-cluster singles and doubles method

## Supplementary Information

Garrette Pauley Paran, Cansu Utku and Thomas-Christian Jagau  
*Department of Chemistry, KU Leuven, Celestijnenlaan 200F, B-3001 Leuven, Belgium*

### 1 Cartesian geometries

\$comment

ortho-benzyne, triplet state, Cartesian geometry in Angstrom

Nuclear Repulsion Energy = 186.77967739 a.u.

\$end

\$molecule

O 3

|   |           |          |           |
|---|-----------|----------|-----------|
| H | 2.476058  | 0.000000 | -0.120773 |
| C | 1.397826  | 0.000000 | -0.115266 |
| C | 0.690428  | 0.000000 | 1.085671  |
| H | 1.229929  | 0.000000 | 2.017939  |
| C | -0.690428 | 0.000000 | 1.085671  |
| H | -1.229929 | 0.000000 | 2.017939  |
| C | -1.397826 | 0.000000 | -0.115266 |
| H | -2.476058 | 0.000000 | -0.120773 |
| C | -0.692326 | 0.000000 | -1.284303 |
| C | 0.692326  | 0.000000 | -1.284303 |

\$end

\$comment  
meta-benzyne, triplet state, Cartesian geometry in Angstrom  
Nuclear Repulsion Energy = 187.20365817 a.u.  
\$end

\$molecule  
O 3  
H -2.14689 0.000000 1.16892  
C -1.21423 0.000000 0.63214  
C 0.00000 0.000000 1.31213  
H 0.00000 0.000000 2.39042  
C 1.21423 0.000000 0.63214  
H 2.14689 0.000000 1.16892  
C 1.15425 0.000000 -0.73302  
C 0.00000 0.000000 -1.47122  
H 0.00000 0.000000 -2.54931  
C -1.15425 0.000000 -0.73302  
\$end

\$comment  
para-benzyne, triplet state, Cartesian geometry in Angstrom  
Nuclear Repulsion Energy = 187.10951165 a.u.  
\$end

\$molecule  
O 3  
H 2.144994 -1.255165 0.000000  
C 1.222802 -0.697850 0.000000  
C 1.222802 0.697850 0.000000  
H 2.144994 1.255165 0.000000  
C 0.000000 1.308815 0.000000  
C -1.222802 0.697850 0.000000  
H -2.144994 1.255165 0.000000  
C -1.222802 -0.697850 0.000000  
H -2.144994 -1.255165 0.000000  
C 0.000000 -1.308815 0.000000  
\$end

\$comment  
CUAQAC02, triplet state, Cartesian geometry in Angstrom  
Nuclear Repulsion Energy = 3174.87801338 a.u.  
\$end

\$molecule  
O 3  
Cu -0.4475643610 -0.0120963053 -1.2187131839  
Cu 0.4475643610 0.0120963053 1.2187131839  
C -1.5516738597 -1.9174459710 0.6216855123  
C 1.5516738597 1.9174459710 -0.6216855123  
C -2.4404422951 -3.0767823055 0.9891436674  
C 2.4404422951 3.0767823055 -0.9891436674  
C 1.7884683766 -1.6766996168 -0.6862923408  
C -1.7884683766 1.6766996168 0.6862923408  
C 2.8741200254 -2.6422066929 -1.0840583784  
C -2.8741200254 2.6422066929 1.0840583784  
H -1.8293382510 -3.9790509196 1.0248530293  
H 1.8293382510 3.9790509196 -1.0248530293  
H -3.2258364073 -3.2142752931 0.2520287447  
H 3.2258364073 3.2142752931 -0.2520287447  
H -2.8627428887 -2.9234745771 1.9793067222  
H 2.8627428887 2.9234745771 -1.9793067222  
H 2.9887046283 -3.4087941897 -0.3208559893  
H -2.9887046283 3.4087941897 0.3208559893  
H 2.6596867698 -3.0896360878 -2.0494344473  
H -2.6596867698 3.0896360878 2.0494344473  
H 3.8148426588 -2.0943168142 -1.1445126369  
H -3.8148426588 2.0943168142 1.1445126369  
H -2.3601778555 0.6855733244 -2.7932158752  
H 2.3601778555 -0.6855733244 2.7932158752  
H -2.2881709015 -0.8355308500 -2.8370271162  
H 2.2881709015 0.8355308500 2.8370271162  
O -1.6039546736 -1.4940498512 -0.5633853188  
O 1.6039546736 1.4940498512 0.5633853188  
O -0.9814838837 1.3115042001 1.5765454220  
O 0.9814838837 -1.3115042001 -1.5765454220  
O 0.8033864073 1.4688139814 -1.5261581319  
O -0.8033864073 -1.4688139814 1.5261581319  
O -1.7814477378 1.2892257086 -0.5128288755  
O 1.7814477378 -1.2892257086 0.5128288755  
O -1.7940678183 -0.0428536234 -3.0630837058  
O 1.7940678183 0.0428536234 3.0630837058  
\$end

\$comment

PATFIA, triplet state, Cartesian geometry in Angstrom

Nuclear Repulsion Energy = 2804.51624162 hartrees

\$end

\$molecule

2 3

|    |               |               |               |
|----|---------------|---------------|---------------|
| Cu | 1.7087227025  | -0.1792834903 | 0.1608894488  |
| Cu | -1.7153965803 | -0.1621452984 | 0.1726197439  |
| O  | 1.1510877085  | 1.5186111353  | 0.8977506371  |
| C  | 0.0259987040  | 2.0401407554  | 1.0578341471  |
| H  | 0.0146802968  | 3.0227985586  | 1.5416296736  |
| O  | -1.0863580177 | 1.5872962809  | 0.7045453660  |
| O  | -0.0071181378 | -1.0311286136 | 0.5412325888  |
| C  | 0.0030057456  | -2.2756009208 | 1.2155946223  |
| H  | 0.9333350080  | -2.4176420955 | 1.7706126488  |
| H  | -0.7895151328 | -2.3283409390 | 1.9661011991  |
| H  | -0.1154330288 | -3.1118706257 | 0.5180707573  |
| N  | -2.7336423434 | -1.9056433478 | -0.1370361317 |
| H  | -2.5876357917 | -2.5933835980 | 0.5932900883  |
| H  | -2.3832137993 | -2.3341014358 | -0.9887331535 |
| C  | -4.1779826589 | -1.6063992118 | -0.2812385809 |
| H  | -4.5995491335 | -1.5088882249 | 0.7167569764  |
| H  | -4.7040744188 | -2.4177316843 | -0.7819519177 |
| C  | -4.3021627019 | -0.3226480645 | -1.0701279691 |
| H  | -3.9509652816 | -0.4827683024 | -2.0904271954 |
| H  | -5.3399705359 | 0.0104030531  | -1.1255563887 |
| N  | -3.4558063585 | 0.7337142466  | -0.4641119051 |
| C  | -3.1877799322 | 1.7885317544  | -1.4640335437 |
| H  | -2.5934196416 | 2.5748372585  | -1.0094502121 |
| H  | -2.6523323100 | 1.3669152040  | -2.3133245196 |
| H  | -4.1278307542 | 2.2120268177  | -1.8243815287 |
| C  | -4.1337542238 | 1.3399052215  | 0.7052696848  |
| H  | -3.4822453447 | 2.0864572595  | 1.1483079253  |
| H  | -4.3596974913 | 0.5819780017  | 1.4521592151  |
| H  | -5.0663404102 | 1.8100631123  | 0.3869947656  |
| N  | 2.6201735674  | -1.8968553219 | -0.4678369142 |
| H  | 2.4357916814  | -2.7001126866 | 0.1223649203  |
| H  | 2.2456395244  | -2.1388704123 | -1.3807648385 |
| C  | 4.0798535321  | -1.6552639611 | -0.5721153213 |
| H  | 4.5006453777  | -1.7281982560 | 0.4282594133  |
| H  | 4.5713720983  | -2.4004889581 | -1.1950634155 |
| C  | 4.2637661191  | -0.2692572306 | -1.1472915868 |

|       |              |               |               |
|-------|--------------|---------------|---------------|
| H     | 3.8892250618 | -0.2476605094 | -2.1715119771 |
| H     | 5.3175409713 | 0.0140447135  | -1.1748259443 |
| N     | 3.4875316595 | 0.7156442408  | -0.3589983072 |
| C     | 3.2835211482 | 1.9414419703  | -1.1598403187 |
| H     | 2.7641842796 | 2.6793528630  | -0.5581710474 |
| H     | 2.6879045539 | 1.7117465834  | -2.0420692295 |
| H     | 4.2450530380 | 2.3463113052  | -1.4814884068 |
| C     | 4.1992063212 | 1.0681887976  | 0.8912164078  |
| H     | 3.5810602997 | 1.7434307266  | 1.4745666489  |
| H     | 4.3989122355 | 0.1783492095  | 1.4853492250  |
| H     | 5.1497006857 | 1.5522941282  | 0.6575385510  |
| \$end |              |               |               |

## 2 Artificial multiplet splittings

**Table 2.** Artificial energy splittings  $E(M_S = 0) - E(M_S = 1)$  in eV between high-spin and low-spin components of the triplet states of various molecules.

|                         | CH <sub>2</sub>                 |                                 | NH <sub>2</sub> <sup>+</sup>    |                | SiH <sub>2</sub>            |                             | PH <sub>2</sub> <sup>+</sup> |                             |
|-------------------------|---------------------------------|---------------------------------|---------------------------------|----------------|-----------------------------|-----------------------------|------------------------------|-----------------------------|
|                         | UHF                             | ROHF                            | UHF                             | ROHF           | UHF                         | ROHF                        | UHF                          | ROHF                        |
| SF-CCSD                 | 0.0129                          | 0.0000                          | 0.0198                          | 0.0000         | 0.0044                      | 0.0000                      | 0.0066                       | 0.0000                      |
| SF-CC2                  | 0.1086                          | 0.0431                          | 0.1635                          | 0.0486         | 0.0534                      | 0.0342                      | 0.0787                       | 0.0466                      |
| SF-RI-CC2               | 0.1087                          | 0.0432                          | 0.1637                          | 0.0488         | 0.0539                      | 0.0349                      | 0.0766                       | 0.0469                      |
| SF-ADC(2)               | 0.1298                          | -0.1127                         | 0.2021                          | -0.2121        | 0.0531                      | -0.0414                     | 0.0825                       | -0.0602                     |
| SF-CIS(D <sub>∞</sub> ) | 0.1357                          | —                               | 0.2087                          | —              | 0.0613                      | —                           | 0.0910                       | —                           |
|                         | NH                              |                                 | NF                              |                | OH <sup>+</sup>             |                             | O <sub>2</sub>               |                             |
|                         | UHF                             | ROHF                            | UHF                             | ROHF           | UHF                         | ROHF                        | UHF                          | ROHF                        |
| SF-CCSD                 | 0.0144                          | 0.0000                          | 0.0224                          | 0.0000         | 0.0146                      | 0.0000                      | 0.0339                       | 0.0000                      |
| SF-CC2                  | 0.1365                          | 0.0580                          | 0.1552                          | 0.0741         | 0.1455                      | 0.0559                      | 0.2482                       | 0.1901                      |
| SF-RI-CC2               | 0.1366                          | 0.0582                          | 0.1561                          | 0.0749         | 0.1457                      | 0.0559                      | 0.2502                       | 0.1921                      |
| SF-ADC(2)               | 0.1654                          | -0.1555                         | 0.1108                          | -0.3037        | 0.1756                      | -0.1977                     | 0.3859                       | -0.1736                     |
| SF-CIS(D <sub>∞</sub> ) | 0.1720                          | —                               | 0.2153                          | —              | 0.1813                      | —                           | 0.4893                       | —                           |
|                         | o-C <sub>6</sub> H <sub>4</sub> | m-C <sub>6</sub> H <sub>4</sub> | p-C <sub>6</sub> H <sub>4</sub> | O <sub>3</sub> | <sup>3</sup> B <sub>1</sub> | <sup>3</sup> A <sub>2</sub> | <sup>3</sup> B <sub>2</sub>  | <sup>3</sup> A <sub>1</sub> |
| SF-CCSD                 | 0.0224                          | 0.1744                          | 0.0217                          | SF-CCSD        | 0.0617                      | 0.0858                      | 0.0376                       | 0.0612                      |
| SF-CC2                  | 0.1187                          | 0.3374                          | 0.1187                          | SF-CC2         | 0.2986                      | 0.3100                      | 0.4753                       | 0.3435                      |
| SF-RI-CC2               | 0.1188                          | 0.3375                          | 0.1188                          | SF-ADC(2)      | 0.2694                      | 0.1477                      | 0.2227                       | 0.3702                      |
| SF-ADC(2)               | 0.1031                          | 0.4202                          | 0.1094                          |                |                             |                             |                              |                             |

### 3 Wave function analysis

**Table 3.** Largest two amplitudes obtained in EOM-SF-CCSD, SF-CC2, SF-ADC(2), and SF-CIS( $D_\infty$ ) calculations on the singlet states of various molecules.

|                              | Basis   | EOM-SF-CCSD |         | SF-CC2  |         | SF-RI-CC2 |         | SF-ADC(2) |         | SF-CIS( $D_\infty$ ) |
|------------------------------|---------|-------------|---------|---------|---------|-----------|---------|-----------|---------|----------------------|
|                              |         | UHF         | ROHF    | UHF     | ROHF    | UHF       | ROHF    | UHF       | ROHF    | UHF                  |
| CH <sub>2</sub>              | cc-pVQZ | 0.8692      | -0.8723 | -0.8701 | -0.8726 | 0.8701    | -0.8726 | 0.8697    | 0.9316  | 0.8607               |
|                              |         | 0.3160      | 0.3072  | -0.3112 | 0.3033  | 0.3112    | 0.3033  | -0.3123   | 0.3211  | 0.3292               |
| NH <sub>2</sub> <sup>+</sup> | cc-pVQZ | -0.8134     | 0.8173  | -0.8079 | -0.8114 | -0.8079   | -0.8114 | 0.8084    | 0.8443  | 0.7897               |
|                              |         | -0.4732     | -0.4745 | -0.4921 | 0.4934  | -0.4922   | 0.4935  | 0.4912    | 0.5172  | 0.5312               |
| SiH <sub>2</sub>             | cc-pVQZ | -0.9100     | 0.9102  | -0.9171 | 0.9173  | 0.9171    | 0.9173  | 0.9165    | -0.9592 | 0.9137               |
|                              |         | -0.1991     | 0.1955  | -0.1961 | 0.1927  | 0.1961    | 0.1927  | -0.1958   | -0.2035 | 0.2050               |
| PH <sub>2</sub> <sup>+</sup> | cc-pVQZ | -0.9410     | 0.9412  | -0.9465 | -0.9466 | 0.9465    | 0.9466  | 0.9464    | 0.9607  | 0.9421               |
|                              |         | -0.1658     | 0.1626  | 0.1776  | -0.1785 | -0.1777   | 0.1785  | 0.1773    | 0.2054  | 0.2274               |

| Molecule                        | Basis   | EOM-SF-CCSD | SF-CC2  | SF-RI-CC2 | SF-ADC(2) |
|---------------------------------|---------|-------------|---------|-----------|-----------|
| o-C <sub>6</sub> H <sub>4</sub> | cc-pVQZ | 0.8325      | 0.8429  | 0.8429    | 0.8383    |
|                                 |         | -0.2138     | -0.2161 | -0.2161   | -0.2161   |
| m-C <sub>6</sub> H <sub>4</sub> | cc-pVQZ | 0.7726      | -0.7852 | 0.7852    | 0.7773    |
|                                 |         | 0.2778      | -0.2675 | 0.2674    | 0.2774    |
| p-C <sub>6</sub> H <sub>4</sub> | cc-pVQZ | 0.6551      | 0.6786  | -0.6786   | 0.6636    |
|                                 |         | 0.4992      | 0.4741  | -0.4741   | -0.4929   |

| Molecule / State                             | Basis   | EOM-SF-CCSD | SF-CC2  | SF-ADC(2) |
|----------------------------------------------|---------|-------------|---------|-----------|
| O <sub>3</sub> / <sup>3</sup> A <sub>1</sub> | cc-pVDZ | -0.9546     | -0.9164 | 0.9304    |
|                                              |         | -0.1034     | -0.2029 | 0.1536    |
| O <sub>3</sub> / <sup>3</sup> A <sub>2</sub> | cc-pVDZ | -0.9336     | 0.9408  | -0.9454   |
|                                              |         | -0.0934     | 0.0821  | -0.1172   |
| O <sub>3</sub> / <sup>3</sup> B <sub>1</sub> | cc-pVDZ | 0.9342      | 0.9288  | -0.9374   |
|                                              |         | 0.1155      | 0.1504  | 0.1388    |
| O <sub>3</sub> / <sup>3</sup> B <sub>2</sub> | cc-pVDZ | -0.9405     | 0.9440  | 0.9517    |
|                                              |         | -0.1256     | -0.0855 | -0.0980   |

**Table 4.** Largest two amplitudes obtained in EOM-SF-CCSD, SF-CC2, and SF-ADC(2) calculations on the ground state of ozone at different bond lengths and a bond angle of 142.76°. The cc-pVDZ basis set was used in all calculations.

| R/Å                         | EOM-SF-CCSD |         | SF-CC2  |         | SF-ADC(2) |         |
|-----------------------------|-------------|---------|---------|---------|-----------|---------|
| reference state = ${}^3A_1$ |             |         |         |         |           |         |
| 1.30                        | -0.9546     | -0.1034 | -0.9164 | -0.2029 | 0.9304    | 0.1536  |
| 1.35                        | -0.9432     | 0.1444  | -0.8748 | 0.2867  | -0.9061   | 0.2087  |
| 1.40                        | 0.9253      | -0.2001 | 0.8070  | -0.3867 | 0.8710    | 0.2749  |
| 1.45                        | -0.8999     | -0.2667 | -0.7091 | -0.4860 | 0.8216    | 0.3459  |
| 1.50                        | 0.8660      | 0.3394  | -0.5884 | -0.5592 | -0.7595   | 0.4062  |
| 1.55                        | -0.8229     | 0.4136  | 0.5901  | -0.4639 | -0.6957   | 0.4365  |
| 1.60                        | -0.7709     | 0.4841  | -0.5804 | 0.3781  | -0.6510   | 0.4165  |
| 1.65                        | -0.8147     | 0.4249  | 0.5421  | 0.4286  | 0.6420    | -0.4538 |
| reference state = ${}^3A_2$ |             |         |         |         |           |         |
| 1.30                        | -0.9336     | -0.0934 | 0.9408  | 0.0821  | -0.9454   | -0.1172 |
| 1.35                        | 0.9231      | -0.1238 | 0.9344  | 0.0937  | 0.9379    | -0.1723 |
| 1.40                        | 0.9096      | -0.1663 | 0.9276  | 0.1397  | 0.9235    | 0.2504  |
| 1.45                        | 0.8928      | 0.2231  | -0.9178 | 0.2074  | -0.8977   | -0.3424 |
| 1.50                        | 0.8725      | 0.2926  | -0.9006 | 0.2936  | 0.8622    | 0.4309  |
| 1.55                        | 0.8483      | 0.3681  | 0.8727  | 0.3861  | 0.8244    | 0.5033  |
| 1.60                        | 0.8215      | -0.4403 | 0.8376  | -0.4691 | 0.7910    | 0.5567  |
| 1.65                        | 0.7631      | 0.3795  | 0.8028  | 0.5336  | -0.7643   | 0.5945  |
| reference state = ${}^3B_1$ |             |         |         |         |           |         |
| 1.30                        | 0.9342      | 0.1155  | 0.9288  | 0.1504  | -0.9374   | 0.1388  |
| 1.35                        | 0.9223      | 0.1471  | -0.9134 | -0.1911 | -0.9288   | 0.1683  |
| 1.40                        | -0.9047     | -0.1872 | -0.8934 | -0.2358 | -0.9201   | 0.1944  |
| 1.45                        | 0.8795      | 0.2382  | -0.8703 | -0.2821 | 0.9109    | -0.2143 |
| 1.50                        | -0.8438     | -0.3044 | 0.8451  | 0.3325  | 0.8969    | -0.2383 |
| 1.55                        | 0.7908      | 0.3905  | -0.8114 | -0.3991 | 0.8620    | -0.3066 |
| 1.60                        | 0.7142      | 0.4896  | 0.7537  | 0.4918  | 0.7725    | 0.4484  |
| 1.65                        | -0.7154     | 0.5429  | 0.6583  | 0.5978  | 0.6340    | 0.5875  |
| reference state = ${}^3B_2$ |             |         |         |         |           |         |
| 1.30                        | -0.9405     | -0.1256 | 0.9440  | -0.0855 | 0.9517    | -0.0980 |
| 1.35                        | 0.9341      | -0.1404 | -0.9363 | 0.0906  | 0.9480    | -0.1077 |
| 1.40                        | -0.9264     | 0.1574  | -0.9267 | 0.0977  | 0.9445    | -0.1203 |
| 1.45                        | 0.9160      | -0.1817 | -0.9139 | 0.1124  | 0.9404    | -0.1376 |
| 1.50                        | 0.9012      | 0.2182  | -0.8964 | -0.1397 | 0.9348    | -0.1599 |
| 1.55                        | -0.8800     | 0.2690  | -0.8724 | -0.1824 | 0.9270    | -0.1856 |
| 1.60                        | 0.8499      | 0.3328  | -0.8396 | -0.2401 | 0.9169    | -0.2110 |
| 1.65                        | 0.8609      | 0.2451  | 0.8735  | 0.0839  | -0.8636   | 0.2067  |

## 4 Potential energy curves of H<sub>2</sub> and HF

**Table 5.** Potential energy curve of the ground state of H<sub>2</sub> computed with various spin-flip methods and the cc-pVTZ basis set. All energies in a.u. relative to the energy at 0.75Å.

| R/Å  | EOM-SF-CCSD | SF-CC2     | SF-ADC(2)  | SF-CIS(D <sub>∞</sub> ) |
|------|-------------|------------|------------|-------------------------|
| 0.50 | 0.07143154  | 0.07502832 | 0.07515472 | 0.07510728              |
| 0.60 | 0.01878329  | 0.02064839 | 0.02070641 | 0.02067075              |
| 0.75 | 0.00000000  | 0.00000000 | 0.00000000 | 0.00000000              |
| 0.95 | 0.01883390  | 0.01722292 | 0.01722460 | 0.01729710              |
| 1.20 | 0.06023365  | 0.05707509 | 0.05711329 | 0.05726513              |
| 1.40 | 0.09216351  | 0.08777579 | 0.08783516 | 0.08800553              |
| 1.75 | 0.13389682  | 0.12741870 | 0.12749589 | 0.12757175              |
| 2.00 | 0.15184623  | 0.14421101 | 0.14429387 | 0.14425444              |
| 2.50 | 0.16762139  | 0.15885055 | 0.15894010 | 0.15875393              |
| 3.00 | 0.17157542  | 0.16253919 | 0.16263107 | 0.16240828              |
| 3.50 | 0.17244344  | 0.16335589 | 0.16344847 | 0.16321944              |
| 4.00 | 0.17262618  | 0.16352728 | 0.16362001 | 0.16339004              |
| 4.50 | 0.17266584  | 0.16356373 | 0.16365641 | 0.16342638              |
| 5.00 | 0.17267595  | 0.16357269 | 0.16366543 | 0.16343532              |
| 5.50 | 0.17267921  | 0.16357542 | 0.16366833 | 0.16343806              |
| 6.00 | 0.17268044  | 0.16357639 | 0.16366916 | 0.16343902              |



**Table 6.** Potential energy curve of the ground state of HF computed with various spin-flip methods and the 6-31G\*\* basis set. All energies in a.u. relative to the energy at 0.90 Å. Full CI results from A. Dutta, C.D. Sherrill, J. Chem. Phys. 118, 1610 (2003).

| R/Å  | Full CI  | EOM-SF-CCSD | SF-CC2     | SF-ADC(2)  | SF-CIS(D <sub>∞</sub> ) |
|------|----------|-------------|------------|------------|-------------------------|
| 0.70 | 0.101443 | 0.10035112  | 0.09752820 | 0.09715801 | 0.09439159              |
| 0.75 | 0.052102 | 0.05124284  | 0.04872715 | 0.04845883 | 0.04621245              |
| 0.80 | 0.022353 | 0.02176368  | 0.01980438 | 0.01964028 | 0.01803618              |
| 0.85 | 0.006366 | 0.00606571  | 0.00493995 | 0.00486864 | 0.00401877              |
| 0.90 | 0.000000 | 0.00000000  | 0.00000000 | 0.00000000 | 0.00000000              |
| 0.95 | 0.000309 | 0.00062277  | 0.00203325 | 0.00207925 | 0.00300871              |
| 1.00 | 0.005195 | 0.00585188  | 0.00585188 | 0.00899087 | 0.01091500              |
| 1.10 | 0.023150 | 0.02465898  | 0.03156242 | 0.03158706 | 0.03561252              |
| 1.20 | 0.046273 | 0.04895138  | 0.05980061 | 0.05960304 | 0.06558355              |
| 1.30 | 0.070541 | 0.07471935  | 0.08882961 | 0.08811348 | 0.09532063              |
| 1.40 | 0.093800 | 0.09972218  | 0.11561932 | 0.11403606 | 0.12121307              |
| 1.60 | 0.133477 | 0.14291050  | 0.15632525 | 0.15242944 | 0.15630300              |
| 1.80 | 0.162200 | 0.17356837  | 0.17896971 | 0.17324800 | 0.17333151              |
| 2.00 | 0.180725 | 0.19098974  | 0.18954705 | 0.18295133 | 0.18087383              |
| 2.20 | 0.191535 | 0.19871823  | 0.19419053 | 0.18726597 | 0.18421451              |
| 2.40 | 0.197425 | 0.20175181  | 0.19626411 | 0.18922523 | 0.18576186              |
| 2.60 | 0.200510 | 0.20297782  | 0.19535583 | 0.18820083 | 0.18651669              |
| 2.80 | 0.202094 | 0.20351724  | 0.19484491 | 0.18768353 | 0.18690155              |
| 3.00 | 0.202904 | 0.20368123  | 0.19462321 | 0.18745852 | 0.18711014              |
| 3.20 | 0.203323 | 0.20362859  | 0.19454820 | 0.18738155 | 0.18723227              |
| 3.40 | 0.203542 | 0.20362388  | 0.19453738 | 0.18736958 | 0.18730745              |
| 3.60 | 0.203656 | 0.20363527  | 0.19454748 | 0.18737906 | 0.18735348              |
| 3.80 | 0.203714 | 0.20364782  | 0.19455981 | 0.18739109 | 0.18738023              |
| 4.00 | 0.203742 | 0.20365670  | 0.19456868 | 0.18739982 | 0.18739466              |

## 5 Potential energy surface of O<sub>3</sub>

**Table 7.** Potential energy curve of the ground state of O<sub>3</sub> computed with various methods and the cc-pVDZ basis set at a bond angle of 142.76°. All values in a.u.

| R(OO)/Å | CCSD          | CC2            | MP2           |
|---------|---------------|----------------|---------------|
| 1.30    | -224.84003083 | -224.90745501  | -224.86138149 |
| 1.35    | -224.83131580 | -224.91798781  | -224.85322089 |
| 1.40    | -224.81738882 | -224.92689106  | -224.83510604 |
| 1.45    | -224.80001462 | -224.93693093  | -224.80558339 |
| 1.50    | -224.78062443 | -224.95179257  | -224.76210807 |
| 1.55    | -224.76057832 | -224.98257526  | -224.70425022 |
| 1.60    | -224.74114908 | -225.05292901  | -224.63861562 |
| 1.65    | -224.72314464 | no convergence | -224.57662771 |

**Table 8.** Potential energy curve of the ground state of O<sub>3</sub> computed with various spin-flip methods and the cc-pVDZ basis set at a bond angle of 142.76°. The <sup>3</sup>A<sub>1</sub> state is used as reference. All values in a.u.

| R(OO)/Å | EOM-SF-CCSD   | SF-CC2        | SF-ADC(2)     |
|---------|---------------|---------------|---------------|
| 1.30    | -224.82905942 | -224.91984306 | -224.86240974 |
| 1.35    | -224.81948218 | -224.92983262 | -224.84250170 |
| 1.40    | -224.80454769 | -224.93472880 | -224.80620359 |
| 1.45    | -224.78627773 | -224.93843324 | -224.77078248 |
| 1.50    | -224.76598610 | -224.94212315 | -224.73795417 |
| 1.55    | -224.74480481 | -224.94585556 | -224.70721442 |
| 1.60    | -224.72391173 | -224.94942073 | -224.67795694 |
| 1.65    | -224.70204970 | -224.95350420 | -224.65094848 |

**Table 9.** Potential energy curve of the ground state of O<sub>3</sub> computed with various spin-flip methods and the cc-pVDZ basis set at a bond angle of 142.76°. The <sup>3</sup>B<sub>1</sub> state is used as reference. All values in a.u.

| R(OO)/Å | EOM-SF-CCSD   | SF-CC2        | SF-ADC(2)     |
|---------|---------------|---------------|---------------|
| 1.30    | -224.84101525 | -224.87024346 | -224.82660746 |
| 1.35    | -224.83242849 | -224.86782622 | -224.80806855 |
| 1.40    | -224.81865531 | -224.85645635 | -224.77535900 |
| 1.45    | -224.80153744 | -224.83485702 | -224.73117411 |
| 1.50    | -224.78245201 | -224.80183159 | -224.68152310 |
| 1.55    | -224.76245205 | -224.75877604 | -224.63428133 |
| 1.60    | -224.74241844 | -224.71124350 | -224.59802988 |
| 1.65    | -224.71529789 | -224.66640011 | -224.57696800 |

**Table 10.** Potential energy curve of the ground state of O<sub>3</sub> computed with various spin-flip methods and the cc-pVDZ basis set at a bond angle of 142.76°. The <sup>3</sup>B<sub>2</sub> state is used as reference. All values in a.u.

| R(OO)/Å | EOM-SF-CCSD   | SF-CC2        | SF-ADC(2)     |
|---------|---------------|---------------|---------------|
| 1.30    | -224.81013041 | -224.85600234 | -224.80243383 |
| 1.35    | -224.80609368 | -224.86195373 | -224.79193622 |
| 1.40    | -224.79646813 | -224.86211844 | -224.77181557 |
| 1.45    | -224.78293448 | -224.85785563 | -224.74647062 |
| 1.50    | -224.76674261 | -224.85027252 | -224.72046607 |
| 1.55    | -224.74894536 | -224.84001436 | -224.69644394 |
| 1.60    | -224.73048353 | -224.82759184 | -224.67564300 |
| 1.65    | -224.70876342 | -224.85355225 | -224.65835592 |

**Table 11.** Potential energy curve of the ground state of O<sub>3</sub> computed with various spin-flip methods and the cc-pVDZ basis set at a bond angle of 142.76°. The <sup>3</sup>A<sub>2</sub> state is used as reference. All values in a.u.

| R(OO)/Å | EOM-SF-CCSD   | SF-CC2        | SF-ADC(2)     |
|---------|---------------|---------------|---------------|
| 1.30    | -224.83833856 | -224.85322174 | -224.79146178 |
| 1.35    | -224.82861528 | -224.83827159 | -224.76242696 |
| 1.40    | -224.81355485 | -224.81310215 | -224.72801856 |
| 1.45    | -224.79596092 | -224.78252839 | -224.69716854 |
| 1.50    | -224.77854726 | -224.75149353 | -224.67420925 |
| 1.55    | -224.76324577 | -224.72356858 | -224.65889924 |
| 1.60    | -224.75076181 | -224.70065855 | -224.64930768 |
| 1.65    | -224.71831906 | -224.68319601 | -224.64359336 |

**Table 12.** Potential energy curve of the ground state of O<sub>3</sub> computed with CC2 and SF-CC2 using the cc-pVDZ basis set at a bond angle of 116.78°. All values in a.u.

| R(OO)/Å | CC2           | SF-CC2 ( <sup>3</sup> A <sub>1</sub> ) | SF-CC2 ( <sup>3</sup> B <sub>1</sub> ) | SF-CC2 ( <sup>3</sup> B <sub>2</sub> ) | SF-CC2 ( <sup>3</sup> A <sub>2</sub> ) |
|---------|---------------|----------------------------------------|----------------------------------------|----------------------------------------|----------------------------------------|
| 1.30    | -224.94116740 | -224.95354322                          | -224.90407910                          | -224.84994937                          | -224.90041017                          |
| 1.35    | -224.94724247 | -224.95624756                          | -224.89873225                          | -224.85799518                          | -224.89203945                          |
| 1.40    | -224.95030067 | -224.95254922                          | -224.88391154                          | -224.85994699                          | -224.87171637                          |
| 1.45    | -224.95204936 | -224.94592076                          | -224.85803426                          | -224.85716136                          | -224.83944723                          |
| 1.50    | -224.95297987 | -224.93761663                          | -224.82126925                          | -224.85047502                          | -224.79954401                          |
| 1.55    | -224.95117249 | -224.92862259                          | -224.77645855                          | -224.84066904                          | -224.75799859                          |
| 1.60    | -224.94251384 | -224.92004328                          | -224.72873630                          | -224.82844599                          | -224.72022530                          |

**Table 13.** Norms of amplitude vectors from CCSD and CC2 calculations for various states of  $O_3$ . Computed using the cc-pVDZ basis set at a bond angle of  $142.76^\circ$ .

| R(OO)/ $\text{\AA}$ | CCSD      |           | CC2       |               | CCSD      |           | CC2       |           |
|---------------------|-----------|-----------|-----------|---------------|-----------|-----------|-----------|-----------|
|                     | $ T_1 ^2$ | $ T_2 ^2$ | $ T_1 ^2$ | $ T_2 ^2$     | $ T_1 ^2$ | $ T_2 ^2$ | $ T_1 ^2$ | $ T_2 ^2$ |
| $^1A_1$ state       |           |           |           | $^3A_1$ state |           |           |           |           |
| 1.30                | 0.0545    | 0.2187    | 0.1369    | 0.3101        | 0.0404    | 0.2302    | 0.0990    | 0.4079    |
| 1.35                | 0.0862    | 0.2386    | 0.2503    | 0.3822        | 0.0953    | 0.2543    | 0.2009    | 0.4843    |
| 1.40                | 0.1374    | 0.2612    | 0.4705    | 0.4972        | 0.1894    | 0.2879    | 0.3819    | 0.5825    |
| 1.45                | 0.2205    | 0.2887    | 0.9186    | 0.7152        | 0.2857    | 0.3266    | 0.6034    | 0.7003    |
| 1.50                | 0.3554    | 0.3258    | 1.9045    | 1.2480        | 0.3762    | 0.3697    | 0.8642    | 0.8409    |
| 1.55                | 0.5654    | 0.3820    | 4.5665    | 3.3119        | 0.4607    | 0.4174    | 1.1727    | 1.0120    |
| 1.60                | 0.8621    | 0.4723    | 13.3890   | 17.5670       | 0.5491    | 0.4699    | 1.5583    | 1.2357    |
| 1.65                | 1.2334    | 0.6165    | —         | —             | 0.2288    | 0.3624    | 2.1089    | 1.5784    |
| $^3B_1$ state       |           |           |           | $^3B_2$ state |           |           |           |           |
| 1.30                | 0.0555    | 0.1860    | 0.0902    | 0.2277        | 0.0827    | 0.3130    | 0.1444    | 0.3362    |
| 1.35                | 0.0959    | 0.2038    | 0.1556    | 0.2583        | 0.1233    | 0.3137    | 0.2384    | 0.3924    |
| 1.40                | 0.1646    | 0.2269    | 0.2585    | 0.2922        | 0.1830    | 0.3222    | 0.3879    | 0.4682    |
| 1.45                | 0.2656    | 0.2582    | 0.3886    | 0.3243        | 0.2553    | 0.3391    | 0.6010    | 0.5731    |
| 1.50                | 0.3939    | 0.3006    | 0.5103    | 0.3436        | 0.3259    | 0.3635    | 0.8737    | 0.7171    |
| 1.55                | 0.5393    | 0.3560    | 0.5909    | 0.3410        | 0.3823    | 0.3933    | 1.1965    | 0.9079    |
| 1.60                | 0.6752    | 0.4220    | 0.6044    | 0.3141        | 0.4191    | 0.4258    | 1.5628    | 1.1540    |
| 1.65                | 0.1774    | 0.3235    | 0.5267    | 0.2642        | 0.3232    | 0.4682    | 1.0775    | 1.1464    |
| $^3A_2$ state       |           |           |           |               |           |           |           |           |
| 1.30                | 0.1301    | 0.2133    | 0.1610    | 0.2246        |           |           |           |           |
| 1.35                | 0.1975    | 0.2286    | 0.2292    | 0.2344        |           |           |           |           |
| 1.40                | 0.2719    | 0.2462    | 0.2938    | 0.2379        |           |           |           |           |
| 1.45                | 0.3316    | 0.2643    | 0.3349    | 0.2344        |           |           |           |           |
| 1.50                | 0.3634    | 0.2819    | 0.3399    | 0.2344        |           |           |           |           |
| 1.55                | 0.3673    | 0.2988    | 0.3086    | 0.2050        |           |           |           |           |
| 1.60                | 0.3482    | 0.3137    | 0.2536    | 0.1815        |           |           |           |           |
| 1.65                | 0.4289    | 0.3345    | 0.1936    | 0.1574        |           |           |           |           |

**Table 14.** Norms of amplitude vectors from CC2 calculations for various states of  $O_3$ . Computed using the cc-pVDZ basis set at a bond angle of  $116.78^\circ$ .

| R(OO)/ $\text{\AA}$ | $^1A_1$ state |           | $^3A_1$ state |           | $^3B_1$ state |           | $^3B_2$ state |           | $^3A_2$ state |           |
|---------------------|---------------|-----------|---------------|-----------|---------------|-----------|---------------|-----------|---------------|-----------|
|                     | $ T_1 ^2$     | $ T_2 ^2$ |
| 1.30                | 0.0749        | 0.2921    | 0.1199        | 0.4296    | 0.0687        | 0.2208    | 0.1009        | 0.3115    | 0.0874        | 0.2194    |
| 1.35                | 0.1242        | 0.3449    | 0.2402        | 0.5066    | 0.1180        | 0.2465    | 0.1514        | 0.3511    | 0.1499        | 0.2415    |
| 1.40                | 0.2111        | 0.4153    | 0.4313        | 0.6032    | 0.2096        | 0.2743    | 0.2310        | 0.3987    | 0.2521        | 0.2623    |
| 1.45                | 0.3706        | 0.5175    | 0.6631        | 0.7185    | 0.3469        | 0.3013    | 0.3533        | 0.4579    | 0.3713        | 0.2768    |
| 1.50                | 0.6738        | 0.6838    | 0.9368        | 0.8571    | 0.4886        | 0.3198    | 0.5253        | 0.5336    | 0.4525        | 0.2786    |
| 1.55                | 1.2307        | 0.9780    | 1.2581        | 1.0277    | 0.5800        | 0.3208    | 0.7391        | 0.6296    | 0.4619        | 0.2640    |
| 1.60                | 2.0816        | 1.4641    | 1.6385        | 1.2455    | 0.5812        | 0.2979    | 0.9808        | 0.7475    | 0.4035        | 0.2344    |

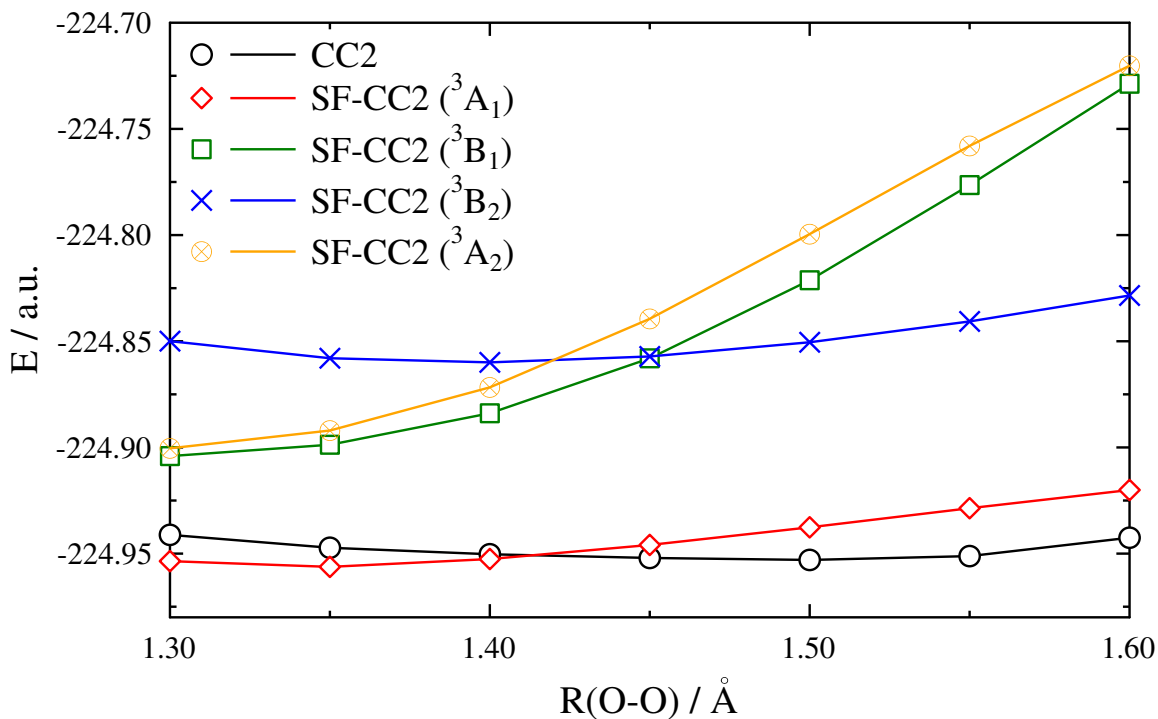

**Figure 1.** Potential energy curves of the ground state of ozone at a bond angle of  $116.78^\circ$  computed with conventional CC2 and SF-CC2 using the  $^3A_1$ ,  $^3B_1$ ,  $^3B_2$ , and  $^3B_2$  states as reference. The cc-pVDZ basis was used for all calculations.

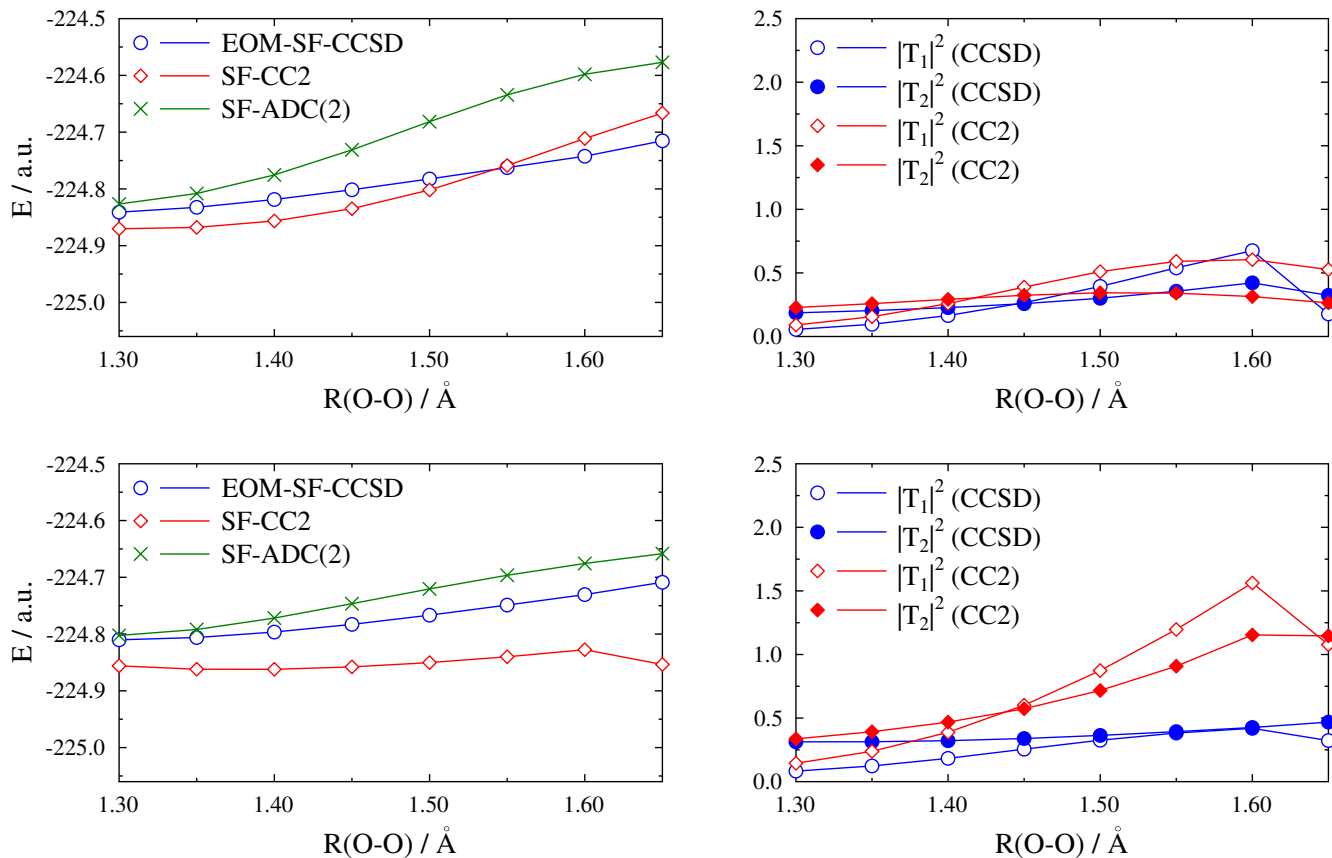

**Figure 2.** Left: Potential energy curves of the ground state of ozone at a bond angle of  $142.76^\circ$  computed with EOM-SF-CCSD, SF-CC2, and SF-ADC(2) using the  $^3B_1$  state (upper panel) and the  $^3B_2$  state (lower panel) as reference. Right: Norms of single and double amplitude vectors from corresponding CCSD and CC2 calculations. The cc-pVDZ basis is used in all calculations.
